# Supplementary material for: Do Nationally Representative Cutpoints for Clinical Muscle Weakness Predict Mortality? Results From 9 Years of Follow-up in the Health and Retirement Study
Source: Oxford University Press journal article supplement (doi:10.1093/gerona/gly169), 2018-07-22
Supplement: gly169_suppl_tables-and-figures.xlsx [file gly169_suppl_tables-and-figures.xlsx]

## Sheet: Table 3_Supplement
	Supplemental Table 3. Extended Cox Proportional Hazard Models: Association between Muscle Weakness and Mortality in the Health and Retirement Study (N=8,326), 2006-2014.
		Model 1		Model 2		Model 3Ϯ		Model 4ϮϮ
		Hazard Ratio	95% CI	Hazard Ratio	95% CI	Hazard Ratio	95% CI	Hazard Ratio	95% CI
	Weaka	1.59***	1.42, 1.77	1.52***	1.15, 1.47	1.32***	1.17, 1.48	1.51***	1.27, 1.79
	Demographic Factors
	Age (years)			1.02**	1.01, 1.03	1	.99,1.01	1	.99, 1.02
	Femaleb			0.73***	.66, .81	0.67***	.60,.74	0.76***	.65, .88
	Blackc			0.86	.74, 1.01	0.87	.74, 1.01	0.85	.68, 1.06
	Educationd
	GED			0.78*	.60, 1.00	0.78	.61,1.02	0.79	.55, 1.13
	High School			0.71***	.63, .82	0.75***	.65,.85	0.64***	.53, .77
	Some college			0.71***	.63, .83	0.78**	.67,.90	0.63***	.51, .78
	College and above			0.54***	.46, .64	0.59***	.50,.70	0.56***	.44, .71
	Smoking Statuse
	Former			1.42***	1.27, 1.59	1.32***	1.18,1.49	1.32	1.12, 1.56
	Current			2.06***	1.70, 2.49	1.60***	1.31,1.96	1.77	1.37, 2.29
	* p<.05
	**p<.01
	***p<.0001
	a Reference group is Non-weak
	b Reference group is Male
	c Reference group is White
	d Reference group is Less than High School education
	e Reference group is Never Smoker
	Ϯ Further adjusted for body mass index, chronic conditions and physical activity
	ϮϮ Further adjusted for individual chronic condtions: high blood pressure, diabetes, cancer, lung disase, heart disease, stroke, psychiatric problems and arthritis
